# Supplementary material for: Single-cell modeling of routine clinical blood tests reveals transient dynamics of human response to blood loss
Source: eLife. 2019 Dec 17;8:e48590. doi: 10.7554/eLife.48590 (PMC6917488; doi:10.7554/eLife.48590)
Supplement: Figure 2—figure supplement 1—source data 1. [file elife-48590-fig2-figsupp1-data1.xlsx]

## Sheet: Sheet1
TimePoint	rMCV	rRDW	MCH	CHDW
0	101.244	11.4593	30.4	6.53644
1	100.47	12.4193	30.645	6.83278
2	101.859	11.1368	30.47	6.98819
0	102.237	11.6271	30.985	7.81487
1	100.292	12.0224	30.8	7.84442
2	96.6011	12.2354	29.4	9.19338
2	102.77	11.9188	32.055	7.90042
2	105.754	10.3542	31.53	7.25477
0	102.771	10.9287	32.1775	6.29572
1	104.721	10.7923	32.39	6.64756
2	103.401	11.0001	32.39	6.73102
0	104.77	11.1837	31.13	6.88269
1	103.275	12.4226	31.425	6.96925
2	98.2135	12.3291	30.15	7.94974
0	96.0399	11.8539	31.245	5.84495
1	100.321	10.8923	31.225	5.63498
2	96.9126	12.736	30.665	6.65764
0	116.444	9.26633	35.6275	6.32547
1	115.349	9.7847	35.585	6.45279
2	116.716	8.89433	35.465	6.78006
0	98.5576	12.3648	29.65	6.74148
1	99.7721	11.8496	29.405	6.83293
2	94.2405	12.9224	28.87	8.20813
0	104.289	11.7717	32.2025	7.34362
1	102.936	11.7647	32.56	7.53356
2	106.211	10.9316	32.61	7.32039
0	97.546	14.0263	30.5225	6.73897
1	95.4215	13.8311	30.355	7.05741
2	99.8001	13.8858	30.36	7.14616
0	102.866	11.3471	31.4275	6.28866
1	101.418	13.0012	31.51	6.24946
2	104.485	10.8248	31.555	6.54405
0	101.667	12.2984	31.0625	6.35665
1	102.137	12.1121	31.22	6.42964
2	101.761	12.1835	31.48	6.40515
0	100.672	12.7848	30.785	7.53131
1	98.7118	14.7895	30.785	7.48133
2	100.159	11.7976	30.66	7.65866
0	100.855	12.1797	30.65	6.92697
1	99.0818	12.8921	30.49	6.95478
2	103.204	12.3362	30.93	6.87962
0	96.3153	14.0192	29.86	7.61338
1	92.8826	15.5219	29.905	7.89648
2	92.9815	14.3113	29.495	8.07736
0	95.8722	12.8206	29.54	7.36469
1	97.5547	11.9587	29.78	7.40991
2	97.5121	12.0055	29.595	7.55288
0	103.513	12.3759	31.9625	6.96335
1	100.134	13.4166	32.095	6.91096
2	104.38	11.8624	31.855	7.03148
0	105.79	11.7737	32.76	6.78521
1	106.474	11.1638	32.745	6.81533
2	107.67	10.5458	32.82	6.55874
0	99.8615	12.6361	30.4475	6.89458
1	97.1642	13.0307	30.58	7.07588
2	102.904	11.2866	30.395	6.84291
0	101.339	12.0931	30.7825	6.82278
1	99.295	12.8211	30.715	6.84807
2	98.2296	12.8574	30.41	7.26194
0	95.5279	13.2808	31.8225	7.72964
1	94.5668	13.7485	31.785	7.72371
2	96.6142	13.129	31.795	8.18715
0	104.995	11.0273	30.7775	6.47341
1	103.243	11.7651	30.975	6.68521
2	101.996	11.6371	30.615	6.88499
0	93.5298	12.947	27.7825	7.82443
1	92.1412	13.0407	27.945	7.87557
2	94.9449	12.3356	28.135	7.91129
0	103.23	11.8867	31.8725	6.77552
1	103.895	11.4369	31.885	6.85956
2	103.579	11.925	31.53	7.17815
0	99.3099	12.8532	30.715	7.56466
1	103.033	11.2352	30.59	7.58067
2	100.94	12.1015	31.055	7.6768
0	105.717	11.2791	32.425	6.4125
1	106.563	10.1447	32.425	6.34845
