# Supplementary material for: Single-cell modeling of routine clinical blood tests reveals transient dynamics of human response to blood loss
Source: eLife. 2019 Dec 17;8:e48590. doi: 10.7554/eLife.48590 (PMC6917488; doi:10.7554/eLife.48590)
Supplement: Figure 2—source data 1. [file elife-48590-fig2-data1.xlsx]

## Sheet: Sheet1
TimePoint	HGB	HCT	MCV	RDW	MCHC	rFraction	alpha	betav	betah	Dv	Dh	vc
0	13.4477	39.045	88.6075	11.824	34.4416	1.36845	0.00182913	15.4884	10.6667	1.13394	0.0136056	71.2364
1	12.942	36.695	87.245	12.0656	35.2691	1.46945	0.00218647	13.4657	12.4651	2.37844	0.0373568	69.1652
2	12.9325	36.975	87.505	12.2081	34.9763	1.80081	0.00204181	12.6613	10.1693	1.03738	0.0129348	70.9386
0	13.1361	37.3625	88.515	12.4443	35.1586	1.92434	0.00258947	10.9238	11.1313	1.2137	0.0163653	69.5713
1	11.8545	33.87	88.4	12.3086	34.9999	1.89679	0.00456677	11.9054	7.71639	2.29448	0.0248109	69.8721
2	11.1006	32.68	86.885	12.142	33.9674	2.55149	0.00285614	5.61185	8.56761	0.588381	0.0562021	70.8226
2	13.8361	38.22	89.055	12.7354	36.2013	2.898	0.00162608	14.0095	11.2804	1.67665	0.0395169	71.628
2	13.6489	39.695	92.235	12.9737	34.3845	2.0256	0.00205817	14.9063	7.56109	1.6851	3.44656e-09	73.0393
0	14.9898	41.805	90.325	11.632	35.8565	1.22791	0.001722	16.6616	13.3843	1.92537	0.0523649	71.5304
1	13.7631	38.42	90.785	11.8586	35.8228	1.57475	0.000895994	10.7858	17.7458	1.91525	0.0142705	71.8417
2	13.4166	37.62	91.24	12.2838	35.6636	1.5983	0.00159901	14.8463	13.5565	1.57507	0.0074421	73.8364
0	12.6311	36.735	90.98	12.8581	34.3845	1.67369	0.00217322	14.5355	11.6477	1.55785	1.04203e-12	72.366
1	11.773	33.775	90.635	12.8823	34.8571	1.81889	0.0032088	24.6891	4.01952	4.99538	3.28769e-12	69.5794
2	11.4686	33.55	88.625	12.2169	34.1836	1.55207	0.00263068	7.34502	8.21662	0.819826	9.73575e-10	72.4493
0	12.4283	35.2875	88.9475	12.839	35.22	1.86508	0.00118374	18.4087	20.7585	2.09142	0.0601493	70.0781
1	12.1815	34.375	88.47	12.5688	35.4372	1.53978	0.00368222	14.8128	21.8399	3.70001	0.0241966	68.7429
2	11.0005	31.31	87.63	12.8257	35.134	1.80951	0.00177553	14.6349	15.364	1.58663	0.0602655	70.2584
0	14.4061	40.9025	101.308	11.6199	35.2206	1.78375	0.00145509	19.8889	9.55434	2.57169	0.000487907	80.2798
1	13.3362	37.455	100.385	11.6985	35.6059	1.74178	0.00258596	15.7095	15.213	2.90064	2.94873e-13	80.1286
2	14.2991	40.445	100.82	12.2485	35.3544	2.54269	0.00176319	16.0729	10.2449	2.34008	3.55999e-11	81.1186
0	13.5941	39.215	86.0525	13.0832	34.6655	1.27524	0.00206487	16.3396	11.967	1.51547	2.23528e-07	68.5034
1	13.0778	38.875	87.81	12.8267	33.6407	1.06292	0.00122454	12.3523	38.4792	3.53954	0.181593	66.6243
2	12.7231	37.03	84.385	12.5367	34.3588	1.64591	0.00229983	12.005	5.14626	0.785666	2.06522e-07	69.0226
0	13.4264	37.5475	90.47	12.2992	35.7585	2.21738	0.0017381	13.5642	12.2254	1.67569	0.039191	72.0116
1	12.6597	35.04	90.57	12.6145	36.1294	2.18691	0.00300073	18.1484	7.17812	3.69092	0.00941353	70.2809
2	12.7634	36.195	92.94	12.7992	35.2628	2.19286	0.00172198	12.9757	10.6758	1.75213	0.00289746	74.3276
0	14.6492	41.855	87.455	12.2197	34.9999	1.04831	0.00192785	13.4425	13.3302	2.00767	0.0386973	69.6354
1	13.7604	38.51	85.335	12.4558	35.732	1.33976	0.00455279	16.7234	7.61607e-10	3.22372	0.026924	66.4334
2	13.6541	39.21	87.6	12.4962	34.823	1.05741	0.00166159	13.3497	14.6872	1.30898	0.0280466	70.2544
0	15.1958	43.3475	89.985	12.7671	35.0559	1.50091	0.00207231	15.8335	13.5665	1.71582	0.0668539	70.5702
1	14.6501	41.38	89.335	12.7742	35.4038	1.42749	0.0121468	18.22	12.7053	10.3939	0.349916	68.6179
2	14.4096	41.54	91.355	12.9141	34.6884	2.05107	0.00167161	15.1113	15.1011	1.71363	0.0443815	72.9948
0	15.1872	43.88	89.8025	12.7621	34.6107	0.975512	0.00163661	18.3656	13.2333	1.96134	0.0596905	70.8066
1	14.1838	40.48	89.48	12.8161	35.0389	1.29037	0.00445085	20.0982	13.8551	4.98255	0.105687	68.9108
2	14.6321	41.64	89.965	13.1304	35.1396	1.21674	0.00146863	17.5538	16.3547	1.79567	0.0465183	71.2438
0	15.9054	44.855	87.32	12.7626	35.4595	1.68762	0.0017642	13.6717	14.9277	1.01627	0.0104292	69.5945
1	14.9185	42.575	88.195	12.6538	35.0406	1.78497	6.08537e-14	105.331	121	1.12849	0.0581564	69.7866
2	15.04	42.735	87.475	12.6233	35.1935	1.84239	0.00216676	10.9582	7.9789	0.982137	0.0345508	70.5442
0	16.0155	45.73	87.9475	12.5532	35.0218	1.37749	0.00222937	14.7583	16.8419	1.4589	0.0779727	69.2556
1	15.3035	43.535	87.055	12.4044	35.1521	1.19663	0.00369921	13.7237	7.18861	1.23203	0.0159119	68.9448
2	14.1556	40.54	88.945	12.7466	34.9177	1.56512	0.00166769	15.4262	13.0665	1.11982	0.0389633	71.3815
0	15.0672	42.3925	84.245	13.2714	35.5421	1.44823	0.00245166	12.0647	11.3518	1.2975	0.0317949	66.8344
1	13.8228	38.575	83.845	12.9233	35.8335	1.16375	0.00313041	12.6087	10.6697	2.42223	1.39798e-11	65.9712
2	13.717	38.89	84.07	13.2533	35.2713	1.13834	0.00167354	12.0015	12.6029	1.3416	0.0299246	67.8767
0	16.5695	46.4875	82.77	12.895	35.6428	1.78139	0.00153364	15.4431	11.7991	1.5028	0.087858	65.8365
1	16.1284	45.2	83.8	13.0619	35.6823	2.08457	0.00185085	18.1004	10.7294	1.88824	0.0310334	65.8819
2	15.9041	44.74	83.625	13.563	35.5478	2.28435	0.0017172	14.0398	11.7716	1.35251	0.0583276	66.7087
0	16.3153	46.205	90.8925	12.5356	35.3106	1.73144	0.0020773	16.767	12.8053	1.24961	0.0304698	71.485
1	14.976	41.865	90.115	12.797	35.7722	1.66086	0.00348457	18.3266	12.7895	3.88839	0.0901979	70.1698
2	16.5047	47.565	92.195	12.5373	34.6993	2.05536	0.00179312	13.5846	14.9244	1.43447	0.0495067	74.2996
0	15.7075	44.385	93.15	11.9971	35.3892	1.37386	0.00184386	16.4536	12.8075	1.57494	0.0384158	72.9353
1	14.8939	41.955	92.665	12.1325	35.4998	1.90156	0.00407072	20.7263	10.3201	5.43945	0.109491	71.5628
2	15.1034	43.055	93.985	12.2184	35.0794	1.40737	0.00169026	16.2212	12.7136	1.71355	0.0208455	75.4297
0	15.3011	43.39	86.715	12.857	35.2642	1.50288	0.00249537	18.18	9.16087	2.11527	0.0349262	67.8898
1	14.0707	39.33	85.845	12.8371	35.7761	1.62436	0.00098794	6.80086	16.828	1.15418	9.31959e-10	67.6506
2	14.0856	40.625	88.065	13.1117	34.6724	1.67075	0.00180079	14.166	15.5564	1.57832	0.0470783	70.0872
0	14.8519	42.7325	88.9625	12.7104	34.7554	1.7258	0.00180537	15.0438	11.3391	1.63201	0.0138706	71.5051
1	14.4824	41.285	87.995	12.6944	35.079	1.57254	0.00268682	17.9979	11.0118	3.39413	3.52238e-12	68.2668
2	14.4821	41.615	87.84	12.3941	34.8002	1.81207	0.00203238	11.8225	10.4222	1.57049	4.89635e-10	70.4512
0	17.2715	46.1975	85.6925	12.3925	37.3861	1.50605	0.00202846	12.5629	11.777	1.57043	0.0599062	67.6039
1	15.851	42.03	84.665	12.4662	37.7136	1.75985	0.00341367	9.43032	12.4599	2.8846	0.0169995	66.2636
2	16.689	44.62	85.465	12.8559	37.4025	2.3575	0.00207645	9.40459	10.4808	1.30276	0.0378317	68.223
0	15.25	44.275	90.035	12.5524	34.4438	1.49646	0.00177111	15.3789	11.2322	1.66902	2.11039e-08	71.6505
1	15.0301	43.115	89.285	12.6964	34.8605	1.77376	0.00883116	13.8478	12.8233	5.10667	3.97046e-12	69.784
2	14.8065	42.61	88.55	12.8158	34.7489	1.67642	0.00207659	13.6282	9.66111	1.43673	6.6401e-11	70.982
0	15.5456	43.9675	79.1225	13.9975	35.357	1.5687	0.00194762	12.5579	11.1341	0.961435	0.0511368	63.8968
1	14.6161	40.81	78.345	13.8885	35.8151	1.43458	0.00893122	13.0844	5.42137	3.42099	2.40547e-10	60.6586
2	15.4704	43.58	79.64	14.0624	35.4989	1.96092	0.00217466	12.5259	10.4923	0.957825	0.0335566	63.8885
0	14.2903	40.7175	91.165	12.2334	35.0962	1.55445	0.00178593	16.289	12.8493	1.83776	0.0203473	71.5898
1	13.465	38.12	90.665	12.2536	35.3227	1.65933	0.00294335	14.3415	11.228	3.22373	0.00251675	71.0807
2	13.241	37.8	90.435	12.2726	35.029	1.86062	0.00195406	14.0929	11.4824	1.35326	0.021925	73.3048
0	16.242	45.185	86.0825	12.881	35.9455	1.8848	0.00237941	15.3119	9.12795	1.46435	0.0322015	67.3267
1	14.2196	39.885	86.255	13.0523	35.6514	2.16785	0.00148595	11.3975	13.5936	2.03729	1.08509e-11	67.2994
2	15.8493	43.905	86.48	13.0254	36.0991	2.04823	0.00157725	15.7616	10.6327	1.58317	0.0411977	68.8971
0	15.14	42.61	92.025	12.4564	35.5316	1.46794	0.00205622	17.6995	11.1505	1.76672	8.59361e-08	72.0587
1	15.0663	43.165	93.33	12.301	34.9039	1.44529	0.00154056	14.6117	24.7197	2.27847	0.0630666	72.7821
2	14.4935	40.74	91.785	12.5676	35.5756	1.77844	0.00152848	18.0797	13.2016	1.96699	0.0097842	73.4647
0	15.1543	42.78	82.6275	12.8331	35.4238	1.48387	0.00219109	14.4117	8.18011	1.43543	2.33685e-07	65.3422
1	13.8556	38.53	81.905	12.953	35.9605	1.62338	0.0017928	30.1966	8.30126e-05	2.7084	1.05863e-06	62.8244
2	14.5277	41.305	84.15	13.0176	35.1719	2.18106	0.00167306	15.2409	13.1697	1.37092	0.0176793	67.638
2	14.4935	40.74	91.785	12.5676	35.5756	1.77844	0.00152848	18.0797	13.2016	1.96699	0.0097842	73.4647
0	15.1543	42.78	82.6275	12.8331	35.4238	1.48387	0.00219109	14.4117	8.18011	1.43543	2.33685e-07	65.3422
1	13.8556	38.53	81.905	12.953	35.9605	1.62338	0.0017928	30.1966	8.30126e-05	2.7084	1.05863e-06	62.8244
2	14.5277	41.305	84.15	13.0176	35.1719	2.18106	0.00167306	15.2409	13.1697	1.37092	0.0176793	67.638
