# Supplementary material for: Single-cell modeling of routine clinical blood tests reveals transient dynamics of human response to blood loss
Source: eLife. 2019 Dec 17;8:e48590. doi: 10.7554/eLife.48590 (PMC6917488; doi:10.7554/eLife.48590)
Supplement: Figure 5—source data 1. [file elife-48590-fig5-data1.xlsx]

## Sheet: TopLeft
0.00450152
0.288154
-0.238634
0.463199
-0.245967
-0.0816641
-1.23115
0.479327
0.880124
0.412336
0.558156
0.0438648
0.359615
0.165843
0.405516
0.599707
0.73043
-0.43636
0.319086
-0.0918258
0.104276
0.343743
0.126434
-0.216095
-0.548378
0.452371

## Sheet: TopRight
-0.248453
-0.986012
-0.243175
-0.611208
-0.313531
-0.238598
0.680193
-0.892827
-0.920224
-0.689943
0.0957455
0.181603
-0.231509
-0.606607
-0.133828
-1.02164
-0.418356
-1.10455
-0.268448
-0.337548
-0.0774696
-0.340491
-0.292721
0.426261
0.676155
-0.788968

## Sheet: BottomLeft
0.326895
-0.0353162
0.305523
0.247637
-0.174105
0.228916
0.0406627
0.230868
0.392618
0.0135154
0.062516
0.181325
0.303201
0.208371
0.0698248
-0.0464968
0.112172
0.395414
0.0507806
0.192872
0.183666
0.0872372
0.17386
-0.150331
-0.294208
0.329569

## Sheet: BottomRight
0.147558
1.37895
0.0739234
1.03365
1.04896
0.268093
1.34994
-0.221092
0.0763806
0.308851
-0.00133069
0.12111
-0.01235
0.145296
0.149489
0.134863
-0.235954
-0.314182
0.384153
0.503412
0.199311
0.110552
0.368237
0.0875449
0.372881
-0.0213514
